# Supplementary material for: Anti-Cancerous Potential of Polysaccharides Derived from Wheat Cell Culture
Source: MDPI journal article supplement (doi:10.3390/pharmaceutics14051100), 2022-05-20
Supplement: s1 [file s1]

## Supplementary Data

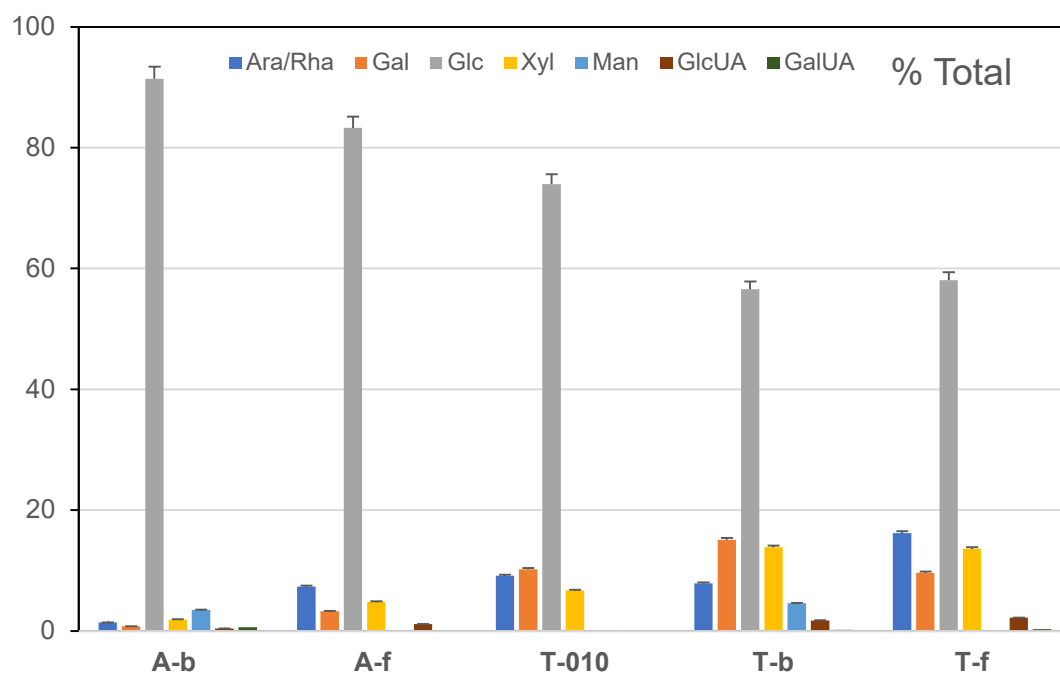

(A)

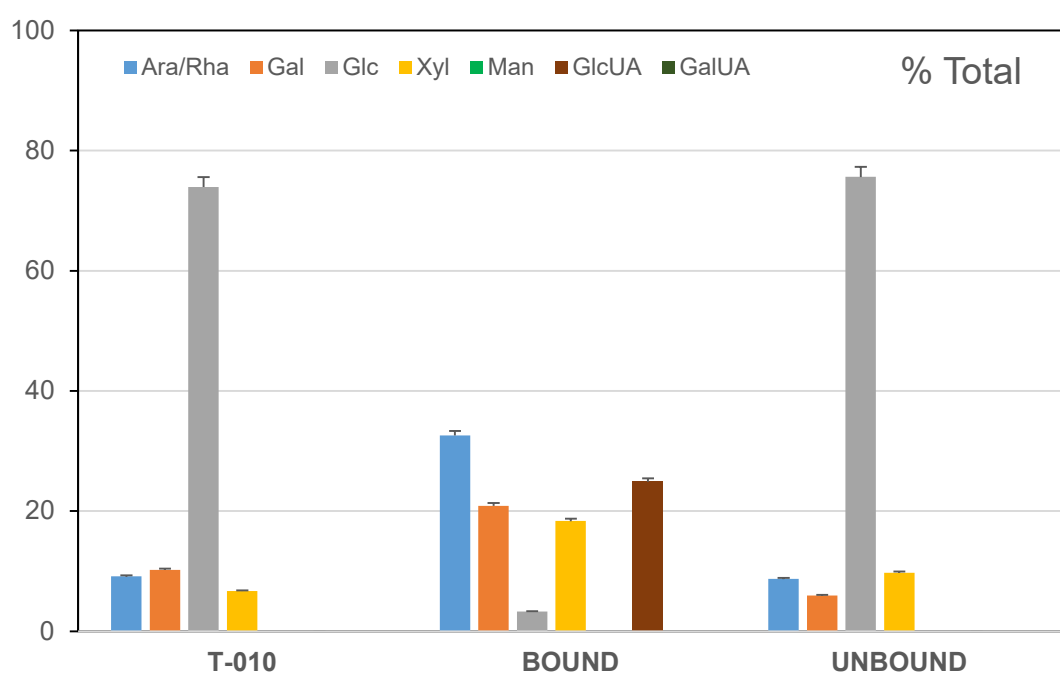

(B)

**Figure S1.** Relative monosaccharide composition of polysaccharide fractions determined by high performance anion exchange chromatography (HPAEC). (A) The main T and A fractions. (B) Fraction T-010 and the bound and unbound fractions.
